# Supplementary material for: Low-Viscosity Polydimethylsiloxane Resin for Facile 3D Printing of Elastomeric Microfluidics
Source: MDPI journal article supplement (doi:10.3390/mi14040773), 2023-03-30
Supplement: s1 [file s1]

## Supplementary

Table S1 Rheology Sample Compositions

|                 | DMS-R22<br>(w/w%) | RMS-083<br>(w/w%) | Sudan I<br>(w/w%) | ITX<br>(w/w%) | TPO-L<br>(w/w%) |
|-----------------|-------------------|-------------------|-------------------|---------------|-----------------|
| hv-PDMS         | 0                 | 98.6              | 0.2               | 0.4           | 0.8             |
| 40 w/w% diluent | 40                | 58.71             | 0.09              | 0.4           | 0.8             |
| lv-PDMS         | 80                | 18.71             | 0.09              | 0.4           | 0.8             |
| Diluent only    | 98.71             | 0                 | 0.09              | 0.4           | 0.8             |

**Figure S1** Dimensions of 3D printed microfluidic characterization print  
Part was designed in SOLIDWORKS. All dimensions are in microns.

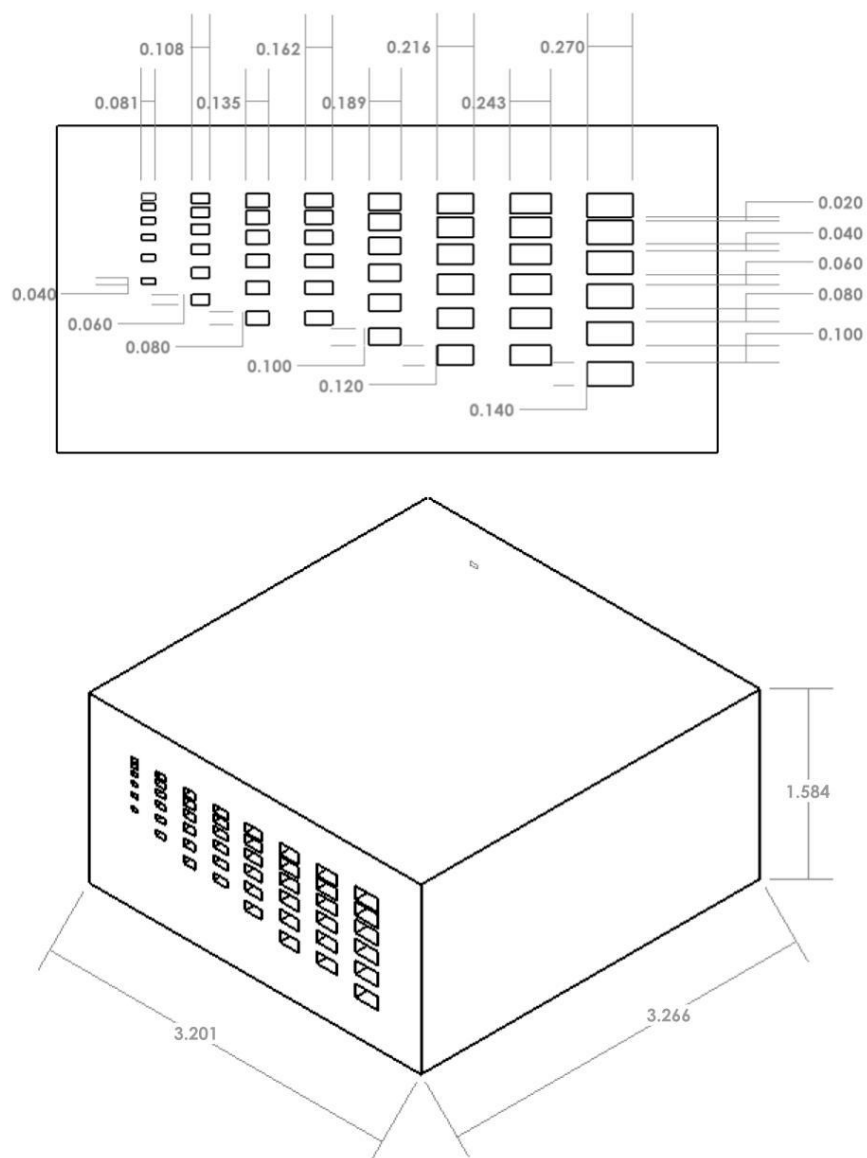

Figure S2 Printing Resolution Characterization

Dimensions of microfluidic characterization print (TOP) and XY pixel resolution print with constant spacing and varying pillar width (MIDDLE) and constant pillar width and varied spacing (BOTTOM).

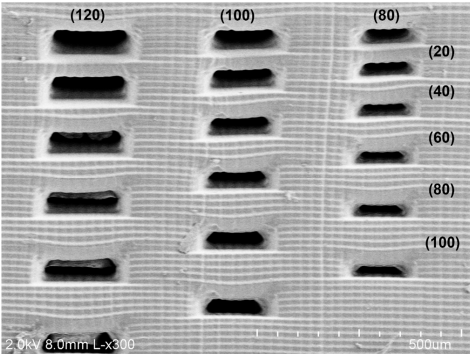

|                    | Designed<br>(µm) | Actual<br>(µm) |         |
|--------------------|------------------|----------------|---------|
| Channel Height     | 80               | 38.4           | +/- 2.0 |
|                    | 100              | 54.3           | +/- 2.5 |
|                    | 120              | 68.0           | +/- 4.1 |
| Membrane Thickness | 20               | 30.9           | +/- 0.3 |
|                    | 40               | 58.1           | +/- 0.5 |
|                    | 60               | 77.7           | +/- 1.0 |
|                    | 80               | 94.4           | +/- 0.2 |
|                    | 100              | 113.1          | +/- 0.5 |

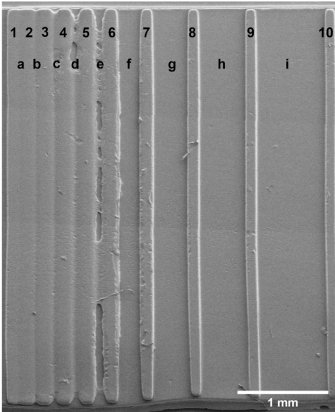

| Pillars |  | 1                 | 2          | 3          | 4          | 5          | 6                    | 7                   | 8                   | 9                   | 10                  |
|---------|--|-------------------|------------|------------|------------|------------|----------------------|---------------------|---------------------|---------------------|---------------------|
|         |  | Actual (μm)       | --         | --         | --         | --         | 163.6<br>+/-<br>18.7 | 143.6<br>+/-<br>9.3 | 118.9<br>+/-<br>7.1 | 106.5<br>+/-<br>4.7 | 112.7<br>+/-<br>7.1 |
|         |  | Designed (pixels) | 162<br>(6) | 162<br>(6) | 162<br>(6) | 162<br>(6) | 162<br>(6)           | 162<br>(6)          | 162<br>(6)          | 162<br>(6)          | 162<br>(6)          |

| Spaces |  | a                 | b         | c         | d         | e          | f                    | g                    | h                   | i                   |
|--------|--|-------------------|-----------|-----------|-----------|------------|----------------------|----------------------|---------------------|---------------------|
|        |  | Actual (μm)       | --        | --        | --        | --         | 226.9<br>+/-<br>16.0 | 393.6<br>+/-<br>16.7 | 510.8<br>+/-<br>9.6 | 759.3<br>+/-<br>4.7 |
|        |  | Designed (pixels) | 27<br>(1) | 54<br>(2) | 81<br>(3) | 108<br>(4) | 135<br>(5)           | 270<br>(10)          | 405<br>(15)         | 540<br>(20)         |

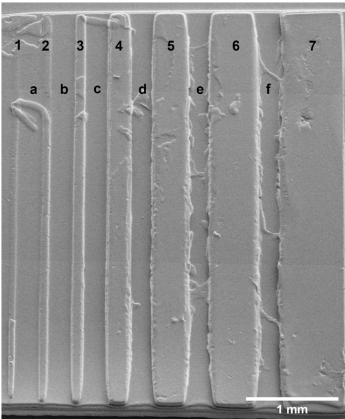

|         |                      | 1           | 2           | 3           | 4           | 5           | 6           | 7           |
|---------|----------------------|-------------|-------------|-------------|-------------|-------------|-------------|-------------|
| Pillars | Actual<br>(μm)       | 56.4        | 79.8        | 118.9       | 255.1       | 399.1       | 527.4       | 694.1       |
|         |                      | +/-<br>7.0  | +/-<br>4.1  | +/-<br>5.8  | +/-<br>4.9  | +/-<br>10.7 | +/-<br>12.9 | +/-<br>32.0 |
|         | Designed<br>(pixels) | 81<br>(3)   | 108<br>(4)  | 135<br>(5)  | 270<br>(10) | 405<br>(15) | 540<br>(20) | 810<br>(30) |
|         |                      | a           | b           | c           | d           | e           | f           |             |
| Spaces  | Actual<br>(μm)       | 266.8       | 258.1       | 244.1       | 226.9       | 237.1       | 247.4       |             |
|         |                      | +/-<br>8.2  | +/-<br>4.2  | +/-<br>4.7  | +/-<br>6.8  | +/-<br>8.5  | +/-<br>15   |             |
|         | Designed<br>(pixels) | 270<br>(10) | 270<br>(10) | 270<br>(10) | 270<br>(10) | 270<br>(10) | 270<br>(10) |             |

Figure S3 Tensile testing setup

Tensile tests were performed using a TA×XT-PLUS Texture Analyser. The analyser has a load cell capacity of 30 kg, distance capacity from 0.1 - 295 mm, distance resolution of 0.001 mm, and speed capacity from 0.01 - 40 mm/s. Tests were performed in tension at a rate of 0.2 mm/s until fracture. The setup of a 3D printed tensile bar in tension is shown below and a short movie in 2x speed is available (Video S2).

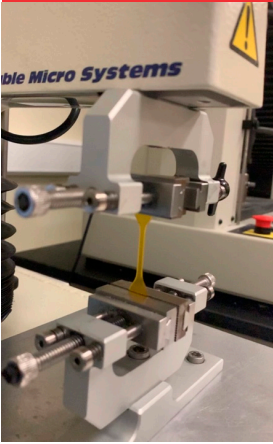

Figure S3-S4 Dimensions of 3D printed tensile bars

Part was designed in SOLIDWORKS. Dimensioned drawing of tensile bars printed for mechanical testing (left). Bars were drawn-designed according to ASTM D412 die C and a 0.44x scalar was applied so that the bars would fit within the build area of the Asiga MX X27 UV printer. The acrylic mold used to fabricate Sylgard 184 samples is shown on the right.

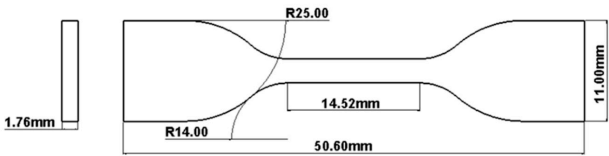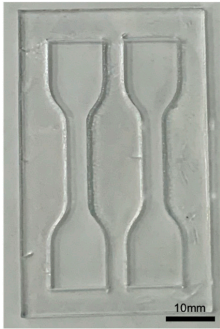



Figure S4-S5 Dimensions of Plate layout of 96 well plate with 3D printed 3-well tissue culture plates inserts  
Part was designed in SOLIDWORKS. All dimensions are in millimeters.

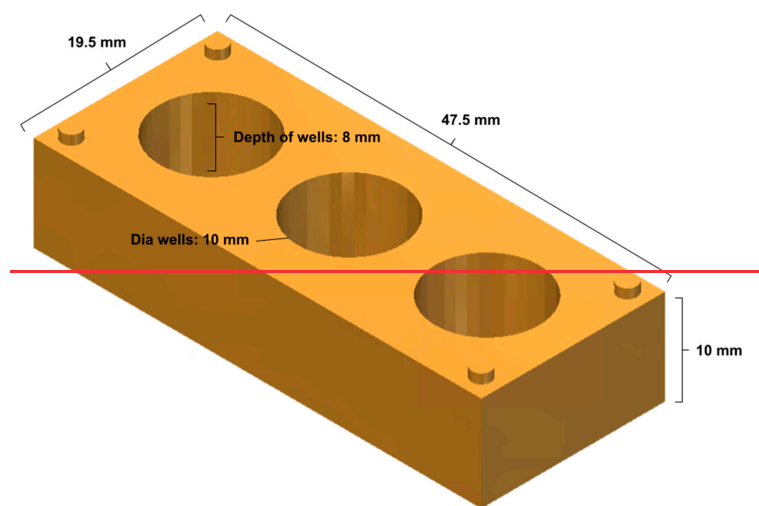

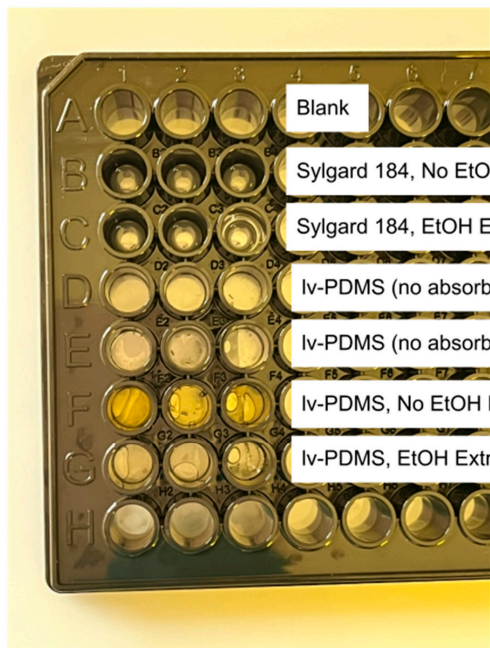

Formatted: Left



Figure S5-S6 HepG2 well plate photos at 0 hours (top), 48 hours (middle), and 72 hours (bottom)

0 Hours

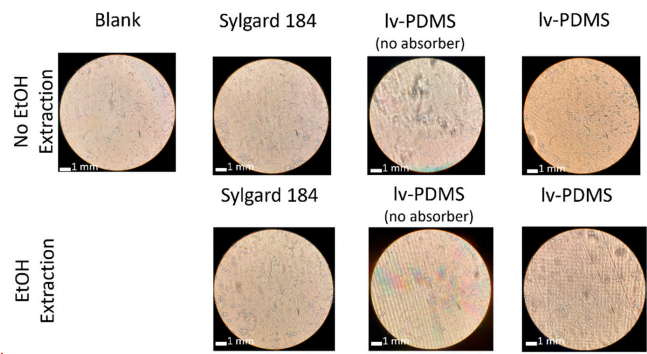

Formatted: Font: Italic

Formatted: No underline

48 Hours

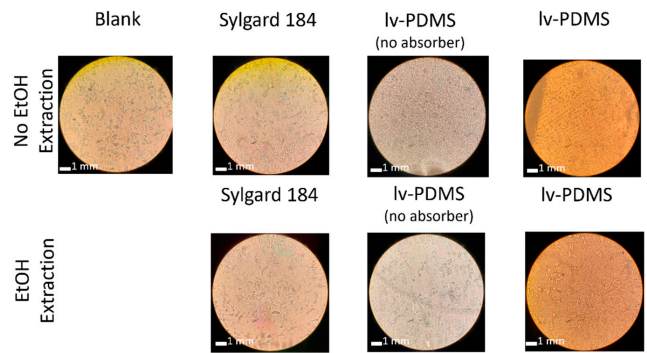

Formatted: Font: Italic, No underline

Formatted: Font: Not Italic

72 Hours

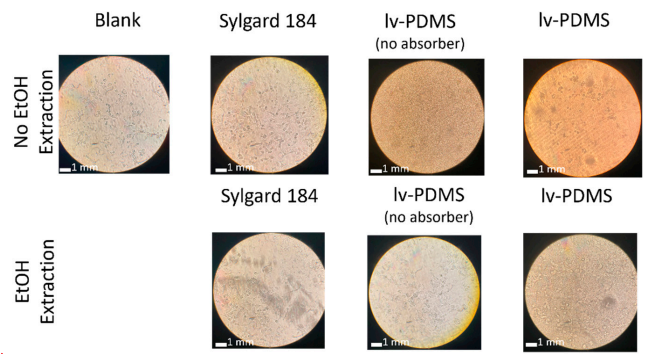

Formatted: Font: Italic, No underline

Formatted: No underline

**Figure S7** Dimensions of 3D printed biomimetic branching network

**Formatted:** Underline

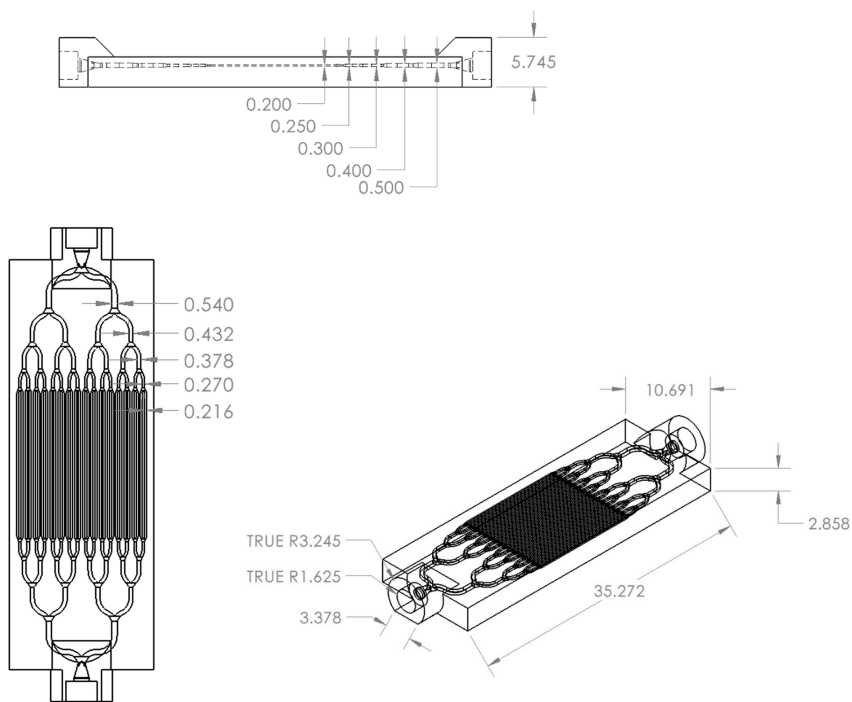

Figure S6-S8 Dimensions of 3D printed droplet generator

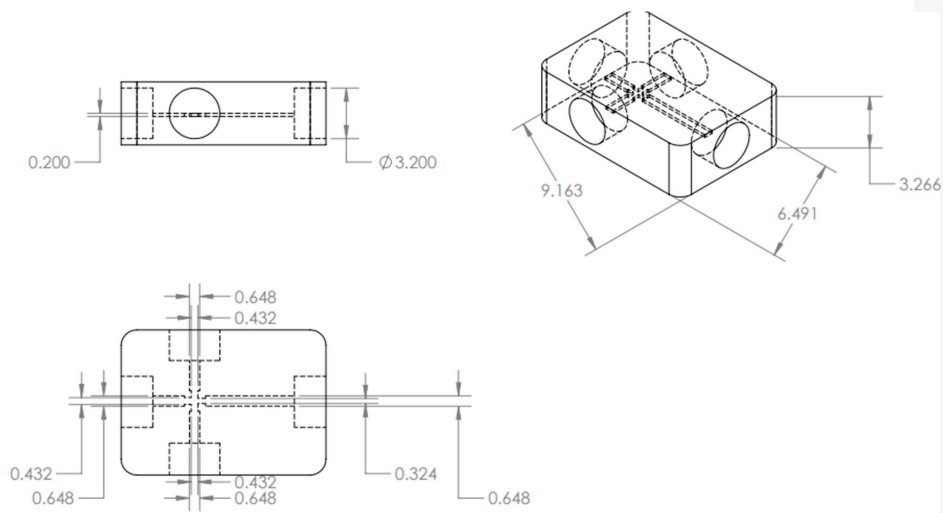

Table S2 2-way ANOVA results for HepG2 cell viability study

|                          |                                                           |         |                 |                   |                              |
|--------------------------|-----------------------------------------------------------|---------|-----------------|-------------------|------------------------------|
| Table Analyzed           | Baseline-corrected of HepG2 with fibronectin transfer RFU |         |                 |                   |                              |
| Two-way RM ANOVA         | Matching: Stacked                                         |         |                 |                   |                              |
| Assume sphericity?       | No                                                        |         |                 |                   |                              |
| Alpha                    | 0.05                                                      |         |                 |                   |                              |
| Source of Variation      | % of total variation                                      | P value | P value summary | Significant?      | Geisser-Greenhouse's epsilon |
| Time x Well condition    | 32                                                        | <0.0001 | ****            | Yes               |                              |
| Time                     | 36                                                        | <0.0001 | ****            | Yes               | 0.80                         |
| Well condition           | 28                                                        | <0.0001 | ****            | Yes               |                              |
| Cell viability           | 1.1                                                       | 0.6216  | ns              | No                |                              |
| ANOVA table              | SS                                                        | DF      | MS              | F (DFn, DFd)      | P value                      |
| Time x Well condition    | 83246                                                     | 12      | 6937            | F (12, 28) = 29   | P<0.0001                     |
| Time                     | 95719                                                     | 2       | 47860           | F (1.6, 22) = 198 | P<0.0001                     |
| Well condition           | 74309                                                     | 6       | 12385           | F (6, 14) = 61    | P<0.0001                     |
| Cell viability           | 2846                                                      | 14      | 203             | F (14, 28) = 0.84 | P=0.6216                     |
| Residual                 | 6754                                                      | 28      | 241             |                   |                              |
| Data summary             |                                                           |         |                 |                   |                              |
| Number of columns        | 7                                                         |         |                 |                   |                              |
| (Well condition)         |                                                           |         |                 |                   |                              |
| Number of rows           | 3                                                         |         |                 |                   |                              |
| (Time)                   |                                                           |         |                 |                   |                              |
| Number of subjects       | 21                                                        |         |                 |                   |                              |
| (Cell viability)         |                                                           |         |                 |                   |                              |
| Number of missing values | 0                                                         |         |                 |                   |                              |

Formatted: Font: 9 pt

Formatted Table

Formatted: Font: 9 pt

Formatted: Font: 9 pt

Formatted Table

Formatted: Font: 9 pt

Formatted Table

Formatted: Font: 9 pt

Formatted Table

Formatted: Font: 9 pt

Table S3 2-way ANOVA Tukey's multiple comparisons results for HepG2 cell viability study

|                                                                 |            |                    |                  |         |                  |
|-----------------------------------------------------------------|------------|--------------------|------------------|---------|------------------|
| Within each row, compare columns (simple effects within rows)   |            |                    |                  |         | ←                |
| Number of families                                              | 3          |                    |                  |         |                  |
| Number of comparisons per family                                | 21         |                    |                  |         |                  |
| Alpha                                                           | 0.05       |                    |                  |         |                  |
| Tukey's multiple comparisons test                               | Mean Diff. | 95.00% CI of diff. | Below threshold? | Summary | Adjusted P Value |
| 24                                                              |            |                    |                  |         |                  |
| Blank vs. Sylgard 184, - EtOH                                   | 10         | -15 to 35          | No               | ns      | 0.3495           |
| Blank vs. Sylgard 184, + EtOH                                   | 14         | -11 to 39          | No               | ns      | 0.2521           |
| Blank vs. Iv-PDMS (no absorber), - EtOH                         | 5.1        | -26 to 36          | No               | ns      | 0.9576           |
| Blank vs. Iv-PDMS (no absorber), + EtOH                         | 14         | -12 to 40          | No               | ns      | 0.2976           |
| Blank vs. Iv-PDMS, - EtOH                                       | -56        | -79 to -34         | Yes              | **      | 0.0019           |
| Blank vs. Iv-PDMS, + EtOH                                       | -19        | -51 to 12          | No               | ns      | 0.1958           |
| Sylgard 184, - EtOH vs. Sylgard 184, + EtOH                     | 4.3        | -22 to 31          | No               | ns      | 0.8850           |
| Sylgard 184, - EtOH vs. Iv-PDMS (no absorber), - EtOH           | -4.9       | -42 to 32          | No               | ns      | 0.9236           |
| Sylgard 184, - EtOH vs. Iv-PDMS (no absorber), + EtOH           | 3.8        | -25 to 32          | No               | ns      | 0.9373           |
| Sylgard 184, - EtOH vs. Iv-PDMS, - EtOH                         | -66        | -86 to -46         | Yes              | **      | 0.0022           |
| Sylgard 184, - EtOH vs. Iv-PDMS, + EtOH                         | -29        | -68 to 8.8         | No               | ns      | 0.0873           |
| Sylgard 184, + EtOH vs. Iv-PDMS (no absorber), - EtOH           | -9.1       | -40 to 22          | No               | ns      | 0.7249           |
| Sylgard 184, + EtOH vs. Iv-PDMS (no absorber), + EtOH           | -0.49      | -27 to 26          | No               | ns      | >0.9999          |
| Sylgard 184, + EtOH vs. Iv-PDMS, - EtOH                         | -70        | -94 to -47         | Yes              | ***     | 0.0010           |
| Sylgard 184, + EtOH vs. Iv-PDMS, + EtOH                         | -34        | -65 to -2.1        | Yes              | *       | 0.0407           |
| Iv-PDMS (no absorber), - EtOH vs. Iv-PDMS (no absorber), + EtOH | 8.7        | -23 to 40          | No               | ns      | 0.7764           |
| Iv-PDMS (no absorber), - EtOH vs. Iv-PDMS, - EtOH               | -61        | -93 to -30         | Yes              | **      | 0.0062           |
| Iv-PDMS (no absorber), - EtOH vs. Iv-PDMS, + EtOH               | -25        | -59 to 9.3         | No               | ns      | 0.1361           |
| Iv-PDMS (no absorber), + EtOH vs. Iv-PDMS, - EtOH               | -70        | -95 to -45         | Yes              | **      | 0.0014           |
| Iv-PDMS (no absorber), + EtOH vs. Iv-PDMS, + EtOH               | -33        | -65 to -1.4        | Yes              | *       | 0.0434           |
| Iv-PDMS, - EtOH vs. Iv-PDMS, + EtOH                             | 37         | 4.7 to 69          | Yes              | *       | 0.0336           |
| 48                                                              |            |                    |                  |         |                  |
| Blank vs. Sylgard 184, - EtOH                                   | -14        | -60 to 31          | No               | ns      | 0.4552           |
| Blank vs. Sylgard 184, + EtOH                                   | -12        | -82 to 58          | No               | ns      | 0.9285           |
| Blank vs. Iv-PDMS (no absorber), - EtOH                         | 30         | -7.3 to 68         | No               | ns      | 0.0956           |
| Blank vs. Iv-PDMS (no absorber), + EtOH                         | -4.2       | -53 to 45          | No               | ns      | 0.9985           |
| Blank vs. Iv-PDMS, - EtOH                                       | 36         | -26 to 99          | No               | ns      | 0.2146           |
| Blank vs. Iv-PDMS, + EtOH                                       | -71        | -140 to -2.5       | Yes              | *       | 0.0452           |
| Sylgard 184, - EtOH vs. Sylgard 184, + EtOH                     | 2.3        | -86 to 91          | No               | ns      | >0.9999          |
| Sylgard 184, - EtOH vs. Iv-PDMS (no absorber), - EtOH           | 45         | 14 to 75           | Yes              | *       | 0.0197           |
| Sylgard 184, - EtOH vs. Iv-PDMS (no absorber), + EtOH           | 10         | -51 to 71          | No               | ns      | 0.8191           |

Formatted Table

|                                                                 |        |              |            |             |         |
|-----------------------------------------------------------------|--------|--------------|------------|-------------|---------|
| Sylgard 184, - EtOH vs. Iv-PDMS, - EtOH                         | 50     | -30 to 130   | No         | ns          | 0.1250  |
| Sylgard 184, - EtOH vs. Iv-PDMS, + EtOH                         | -57    | -144 to 30   | No         | ns          | 0.1154  |
| Sylgard 184, + EtOH vs. Iv-PDMS (no absorber), - EtOH           | 42     | -33 to 118   | No         | ns          | 0.1882  |
| Sylgard 184, + EtOH vs. Iv-PDMS (no absorber), + EtOH           | 7.6    | -60 to 76    | No         | ns          | 0.9929  |
| Sylgard 184, + EtOH vs. Iv-PDMS, - EtOH                         | 48     | -23 to 119   | No         | ns          | 0.1657  |
| Sylgard 184, + EtOH vs. Iv-PDMS, + EtOH                         | -59    | -133 to 14   | No         | ns          | 0.0990  |
| Iv-PDMS (no absorber), - EtOH vs. Iv-PDMS (no absorber), + EtOH | -35    | -84 to 15    | No         | ns          | 0.1316  |
| Iv-PDMS (no absorber), - EtOH vs. Iv-PDMS, - EtOH               | 5.7    | -61 to 73    | No         | ns          | 0.9943  |
| Iv-PDMS (no absorber), - EtOH vs. Iv-PDMS, + EtOH               | -102   | -176 to -27  | Yes        | *           | 0.0229  |
| Iv-PDMS (no absorber), + EtOH vs. Iv-PDMS, - EtOH               | 40     | -22 to 103   | No         | ns          | 0.1805  |
| Iv-PDMS (no absorber), + EtOH vs. Iv-PDMS, + EtOH               | -67    | -134 to 0.17 | No         | ns          | 0.0504  |
| Iv-PDMS, - EtOH vs. Iv-PDMS, + EtOH                             | -107   | -178 to -37  | Yes        | *           | 0.0114  |
| 72                                                              |        |              |            |             |         |
| Blank vs. Sylgard 184, - EtOH                                   | -101   | -182 to -21  | Yes        | *           | 0.0262  |
| Blank vs. Sylgard 184, + EtOH                                   | -82    | -161 to -2.7 | Yes        | *           | 0.0448  |
| Blank vs. Iv-PDMS (no absorber), - EtOH                         | 4.8    | -108 to 118  | No         | ns          | >0.9999 |
| Blank vs. Iv-PDMS (no absorber), + EtOH                         | -92    | -171 to -14  | Yes        | *           | 0.0296  |
| Blank vs. Iv-PDMS, - EtOH                                       | 53     | -28 to 133   | No         | ns          | 0.1515  |
| Blank vs. Iv-PDMS, + EtOH                                       | -192   | -322 to -62  | Yes        | *           | 0.0152  |
| Sylgard 184, - EtOH vs. Sylgard 184, + EtOH                     | 20     | -43 to 82    | No         | ns          | 0.6593  |
| Sylgard 184, - EtOH vs. Iv-PDMS (no absorber), - EtOH           | 106    | -21 to 233   | No         | ns          | 0.0770  |
| Sylgard 184, - EtOH vs. Iv-PDMS (no absorber), + EtOH           | 8.8    | -46 to 63    | No         | ns          | 0.9664  |
| Sylgard 184, - EtOH vs. Iv-PDMS, - EtOH                         | 154    | 108 to 200   | Yes        | ***         | 0.0005  |
| Sylgard 184, - EtOH vs. Iv-PDMS, + EtOH                         | -91    | -240 to 58   | No         | ns          | 0.1481  |
| Sylgard 184, + EtOH vs. Iv-PDMS (no absorber), - EtOH           | 86     | -30 to 203   | No         | ns          | 0.1103  |
| Sylgard 184, + EtOH vs. Iv-PDMS (no absorber), + EtOH           | -11    | -75 to 53    | No         | ns          | 0.9645  |
| Sylgard 184, + EtOH vs. Iv-PDMS, - EtOH                         | 134    | 72 to 197    | Yes        | **          | 0.0041  |
| Sylgard 184, + EtOH vs. Iv-PDMS, + EtOH                         | -110   | -246 to 25   | No         | ns          | 0.0848  |
| Iv-PDMS (no absorber), - EtOH vs. Iv-PDMS (no absorber), + EtOH | -97    | -217 to 23   | No         | ns          | 0.0855  |
| Iv-PDMS (no absorber), - EtOH vs. Iv-PDMS, - EtOH               | 48     | -79 to 175   | No         | ns          | 0.3853  |
| Iv-PDMS (no absorber), - EtOH vs. Iv-PDMS, + EtOH               | -197   | -329 to -64  | Yes        | *           | 0.0126  |
| Iv-PDMS (no absorber), + EtOH vs. Iv-PDMS, - EtOH               | 145    | 91 to 199    | Yes        | **          | 0.0016  |
| Iv-PDMS (no absorber), + EtOH vs. Iv-PDMS, + EtOH               | -100   | -240 to 41   | No         | ns          | 0.1140  |
| Iv-PDMS, - EtOH vs. Iv-PDMS, + EtOH                             | -245   | -394 to -96  | Yes        | *           | 0.0156  |
| Test details                                                    | Mean 1 | Mean 2       | Mean Diff. | SE of diff. | N1      |
| 24                                                              |        |              |            |             |         |

|                                                                 |     |     |       |     |   |
|-----------------------------------------------------------------|-----|-----|-------|-----|---|
| Blank vs. Sylgard 184, - EtOH                                   | 78  | 68  | 10    | 3.7 | 3 |
| Blank vs. Sylgard 184, + EtOH                                   | 78  | 64  | 14    | 5.0 | 3 |
| Blank vs. Iv-PDMS (no absorber), - EtOH                         | 78  | 73  | 5.1   | 5.9 | 3 |
| Blank vs. Iv-PDMS (no absorber), + EtOH                         | 78  | 64  | 14    | 5.1 | 3 |
| Blank vs. Iv-PDMS, - EtOH                                       | 78  | 134 | -56   | 4.5 | 3 |
| Blank vs. Iv-PDMS + EtOH                                        | 78  | 98  | -19   | 6.0 | 3 |
| Sylgard 184, - EtOH vs. Sylgard 184, + EtOH                     | 68  | 64  | 4.3   | 3.8 | 3 |
| Sylgard 184, - EtOH vs. Iv-PDMS (no absorber), - EtOH           | 68  | 73  | -4.9  | 4.9 | 3 |
| Sylgard 184, - EtOH vs. Iv-PDMS (no absorber), + EtOH           | 68  | 64  | 3.8   | 4.1 | 3 |
| Sylgard 184, - EtOH vs. Iv-PDMS, - EtOH                         | 68  | 134 | -66   | 3.2 | 3 |
| Sylgard 184, - EtOH vs. Iv-PDMS, + EtOH                         | 68  | 98  | -29   | 5.0 | 3 |
| Sylgard 184, + EtOH vs. Iv-PDMS (no absorber), - EtOH           | 64  | 73  | -9.1  | 6.0 | 3 |
| Sylgard 184, + EtOH vs. Iv-PDMS (no absorber), + EtOH           | 64  | 64  | -0.49 | 5.3 | 3 |
| Sylgard 184, + EtOH vs. Iv-PDMS, - EtOH                         | 64  | 134 | -70   | 4.6 | 3 |
| Sylgard 184, + EtOH vs. Iv-PDMS, + EtOH                         | 64  | 98  | -34   | 6.1 | 3 |
| Iv-PDMS (no absorber), - EtOH vs. Iv-PDMS (no absorber), + EtOH | 73  | 64  | 8.7   | 6.1 | 3 |
| Iv-PDMS (no absorber), - EtOH vs. Iv-PDMS, - EtOH               | 73  | 134 | -61   | 5.6 | 3 |
| Iv-PDMS (no absorber), - EtOH vs. Iv-PDMS, + EtOH               | 73  | 98  | -25   | 6.8 | 3 |
| Iv-PDMS (no absorber), + EtOH vs. Iv-PDMS, - EtOH               | 64  | 134 | -70   | 4.8 | 3 |
| Iv-PDMS (no absorber), + EtOH vs. Iv-PDMS, + EtOH               | 64  | 98  | -33   | 6.2 | 3 |
| Iv-PDMS, - EtOH vs. Iv-PDMS, + EtOH                             | 134 | 98  | 37    | 5.7 | 3 |
| 48                                                              |     |     |       |     |   |
| Blank vs. Sylgard 184, - EtOH                                   | 113 | 127 | -14   | 6.0 | 3 |
| Blank vs. Sylgard 184, + EtOH                                   | 113 | 125 | -12   | 12  | 3 |
| Blank vs. Iv-PDMS (no absorber), - EtOH                         | 113 | 82  | 30    | 7.1 | 3 |
| Blank vs. Iv-PDMS (no absorber), + EtOH                         | 113 | 117 | -4.2  | 9.5 | 3 |
| Blank vs. Iv-PDMS, - EtOH                                       | 113 | 77  | 36    | 11  | 3 |
| Blank vs. Iv-PDMS, + EtOH                                       | 113 | 184 | -71   | 12  | 3 |
| Sylgard 184, - EtOH vs. Sylgard 184, + EtOH                     | 127 | 125 | 2.3   | 11  | 3 |
| Sylgard 184, - EtOH vs. Iv-PDMS (no absorber), - EtOH           | 127 | 82  | 45    | 4.5 | 3 |
| Sylgard 184, - EtOH vs. Iv-PDMS (no absorber), + EtOH           | 127 | 117 | 10    | 7.6 | 3 |
| Sylgard 184, - EtOH vs. Iv-PDMS, - EtOH                         | 127 | 77  | 50    | 9.7 | 3 |
| Sylgard 184, - EtOH vs. Iv-PDMS, + EtOH                         | 127 | 184 | -57   | 10  | 3 |
| Sylgard 184, + EtOH vs. Iv-PDMS (no absorber), - EtOH           | 125 | 82  | 42    | 11  | 3 |
| Sylgard 184, + EtOH vs. Iv-PDMS (no absorber), + EtOH           | 125 | 117 | 7.6   | 13  | 3 |
| Sylgard 184, + EtOH vs. Iv-PDMS, - EtOH                         | 125 | 77  | 48    | 14  | 3 |
| Sylgard 184, + EtOH vs. Iv-PDMS, + EtOH                         | 125 | 184 | -59   | 15  | 3 |
| Iv-PDMS (no absorber), - EtOH vs. Iv-PDMS (no absorber), + EtOH | 82  | 117 | -35   | 8.6 | 3 |

|                                                                        |            |            |             |            |          |
|------------------------------------------------------------------------|------------|------------|-------------|------------|----------|
| <u>lv-PDMS (no absorber), - EtOH vs. lv-PDMS, - EtOH</u>               | <u>82</u>  | <u>77</u>  | <u>5.7</u>  | <u>10</u>  | <u>3</u> |
| <u>lv-PDMS (no absorber), - EtOH vs. lv-PDMS, + EtOH</u>               | <u>82</u>  | <u>184</u> | <u>-102</u> | <u>11</u>  | <u>3</u> |
| <u>lv-PDMS (no absorber), + EtOH vs. lv-PDMS, - EtOH</u>               | <u>117</u> | <u>77</u>  | <u>40</u>   | <u>12</u>  | <u>3</u> |
| <u>lv-PDMS (no absorber), + EtOH vs. lv-PDMS, + EtOH</u>               | <u>117</u> | <u>184</u> | <u>-67</u>  | <u>13</u>  | <u>3</u> |
| <u>lv-PDMS, - EtOH vs. lv-PDMS, + EtOH</u>                             | <u>77</u>  | <u>184</u> | <u>-107</u> | <u>14</u>  | <u>3</u> |
| 72                                                                     |            |            |             |            |          |
| <u>Blank vs. Sylgard 184, - EtOH</u>                                   | <u>119</u> | <u>220</u> | <u>-101</u> | <u>14</u>  | <u>3</u> |
| <u>Blank vs. Sylgard 184, + EtOH</u>                                   | <u>119</u> | <u>200</u> | <u>-82</u>  | <u>15</u>  | <u>3</u> |
| <u>Blank vs. lv-PDMS (no absorber), - EtOH</u>                         | <u>119</u> | <u>114</u> | <u>4.8</u>  | <u>21</u>  | <u>3</u> |
| <u>Blank vs. lv-PDMS (no absorber), + EtOH</u>                         | <u>119</u> | <u>211</u> | <u>-92</u>  | <u>15</u>  | <u>3</u> |
| <u>Blank vs. lv-PDMS, - EtOH</u>                                       | <u>119</u> | <u>66</u>  | <u>53</u>   | <u>14</u>  | <u>3</u> |
| <u>Blank vs. lv-PDMS, + EtOH</u>                                       | <u>119</u> | <u>311</u> | <u>-192</u> | <u>23</u>  | <u>3</u> |
| <u>Sylgard 184, - EtOH vs. Sylgard 184, + EtOH</u>                     | <u>220</u> | <u>200</u> | <u>20</u>   | <u>12</u>  | <u>3</u> |
| <u>Sylgard 184, - EtOH vs. lv-PDMS (no absorber), - EtOH</u>           | <u>220</u> | <u>114</u> | <u>106</u>  | <u>19</u>  | <u>3</u> |
| <u>Sylgard 184, - EtOH vs. lv-PDMS (no absorber), + EtOH</u>           | <u>220</u> | <u>211</u> | <u>8.8</u>  | <u>11</u>  | <u>3</u> |
| <u>Sylgard 184, - EtOH vs. lv-PDMS, - EtOH</u>                         | <u>220</u> | <u>66</u>  | <u>154</u>  | <u>9.2</u> | <u>3</u> |
| <u>Sylgard 184, - EtOH vs. lv-PDMS, + EtOH</u>                         | <u>220</u> | <u>311</u> | <u>-91</u>  | <u>21</u>  | <u>3</u> |
| <u>Sylgard 184, + EtOH vs. lv-PDMS (no absorber), - EtOH</u>           | <u>200</u> | <u>114</u> | <u>86</u>   | <u>20</u>  | <u>3</u> |
| <u>Sylgard 184, + EtOH vs. lv-PDMS (no absorber), + EtOH</u>           | <u>200</u> | <u>211</u> | <u>-11</u>  | <u>13</u>  | <u>3</u> |
| <u>Sylgard 184, + EtOH vs. lv-PDMS, - EtOH</u>                         | <u>200</u> | <u>66</u>  | <u>134</u>  | <u>12</u>  | <u>3</u> |
| <u>Sylgard 184, + EtOH vs. lv-PDMS, + EtOH</u>                         | <u>200</u> | <u>311</u> | <u>-110</u> | <u>22</u>  | <u>3</u> |
| <u>lv-PDMS (no absorber), - EtOH vs. lv-PDMS (no absorber), + EtOH</u> | <u>114</u> | <u>211</u> | <u>-97</u>  | <u>19</u>  | <u>3</u> |
| <u>lv-PDMS (no absorber), - EtOH vs. lv-PDMS, - EtOH</u>               | <u>114</u> | <u>66</u>  | <u>48</u>   | <u>19</u>  | <u>3</u> |
| <u>lv-PDMS (no absorber), - EtOH vs. lv-PDMS, + EtOH</u>               | <u>114</u> | <u>311</u> | <u>-197</u> | <u>26</u>  | <u>3</u> |
| <u>lv-PDMS (no absorber), + EtOH vs. lv-PDMS, - EtOH</u>               | <u>211</u> | <u>66</u>  | <u>145</u>  | <u>11</u>  | <u>3</u> |
| <u>lv-PDMS (no absorber), + EtOH vs. lv-PDMS, + EtOH</u>               | <u>211</u> | <u>311</u> | <u>-100</u> | <u>21</u>  | <u>3</u> |
| <u>lv-PDMS, - EtOH vs. lv-PDMS, + EtOH</u>                             | <u>66</u>  | <u>311</u> | <u>-245</u> | <u>21</u>  | <u>3</u> |

Supplementary Videos

Video S1, Stretching of a tensile bar demonstrating elasticity of the material.

Video S2, Mechanical testing of a tensile bar at 2x speed.

Formatted: Underline

Formatted: No underline

Formatted: No underline

Formatted: No underline

Formatted: No underline

Formatted: Underline
